# Supplementary material for: Global-scale evaluation of precipitation datasets for hydrological modelling
Source: Copernicus journal article supplement (doi:10.5194/hess-28-3099-2024), 2024-07-17
Supplement: Supplementary file 1 [file hess-28-3099-2024-supplement.pdf]

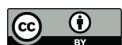

*Supplement of*

## **Global-scale evaluation of precipitation datasets for hydrological modelling**

**Solomon H. Gebrechorkos et al.**

*Correspondence to:* Solomon H. Gebrechorkos ([solomon.gebrechorkos@ouce.ox.ac.uk](mailto:solomon.gebrechorkos@ouce.ox.ac.uk))

The copyright of individual parts of the supplement might differ from the article licence.

**Table S1: List of additional datasets used to run WBMsed.**

| Dataset            | Short name | Long name                                                                | Reference               |
|--------------------|------------|--------------------------------------------------------------------------|-------------------------|
| Air temperature    | ERA5       | ECMWF (European Centre for Medium-Range Weather Forecasts) Reanalysis V5 | Hersbach et al., (2020) |
| Relative Humidity  | NCEP       | NCEP-NCAR Reanalysis                                                     | Kistler et al., (2001)  |
| Air Pressure       | NCEP       | NCEP-NCAR Reanalysis                                                     | Kistler et al., (2001)  |
| Wind Speed         | NCEP       | NCEP-NCAR Reanalysis                                                     | Kistler et al., (2001)  |
| Solar radiation    | CRU-TS     | Climatic Research Unit (CRU) time series                                 | Harris et al., (2020)   |
| Reservoir capacity | GRanD v1.3 | global reservoir and dam database version 1.3                            | Lehner et al., (2011)   |
| river network      | HydroSTN30 | HydroSHEDS                                                               | Lehner et al., (2008)   |

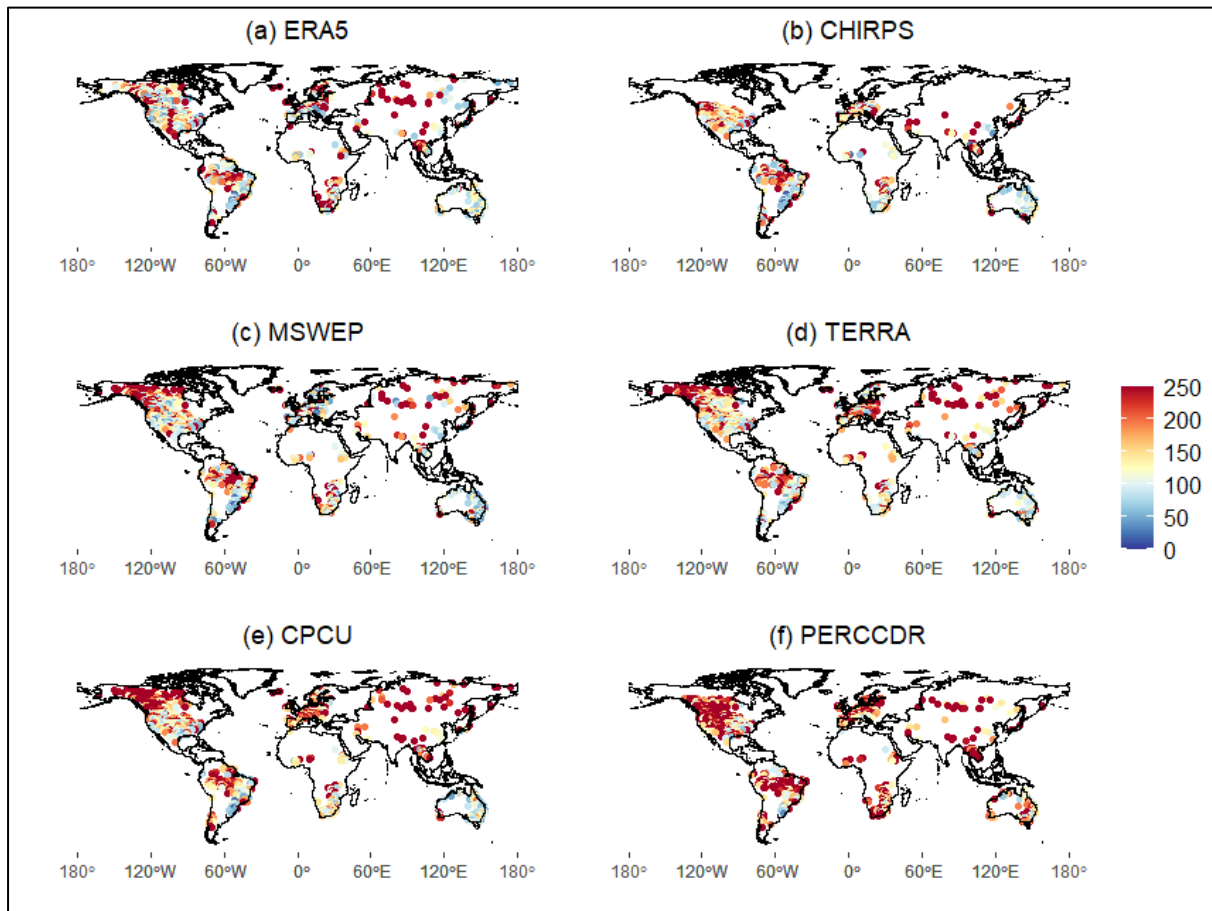

**Figure S1: Normalised RMSE between observed and simulated annual discharge based on a) ERA5, b) CHIRPS, c) MSWEP, d) TERRA, e) CPCU, and f) PERCCDR.**

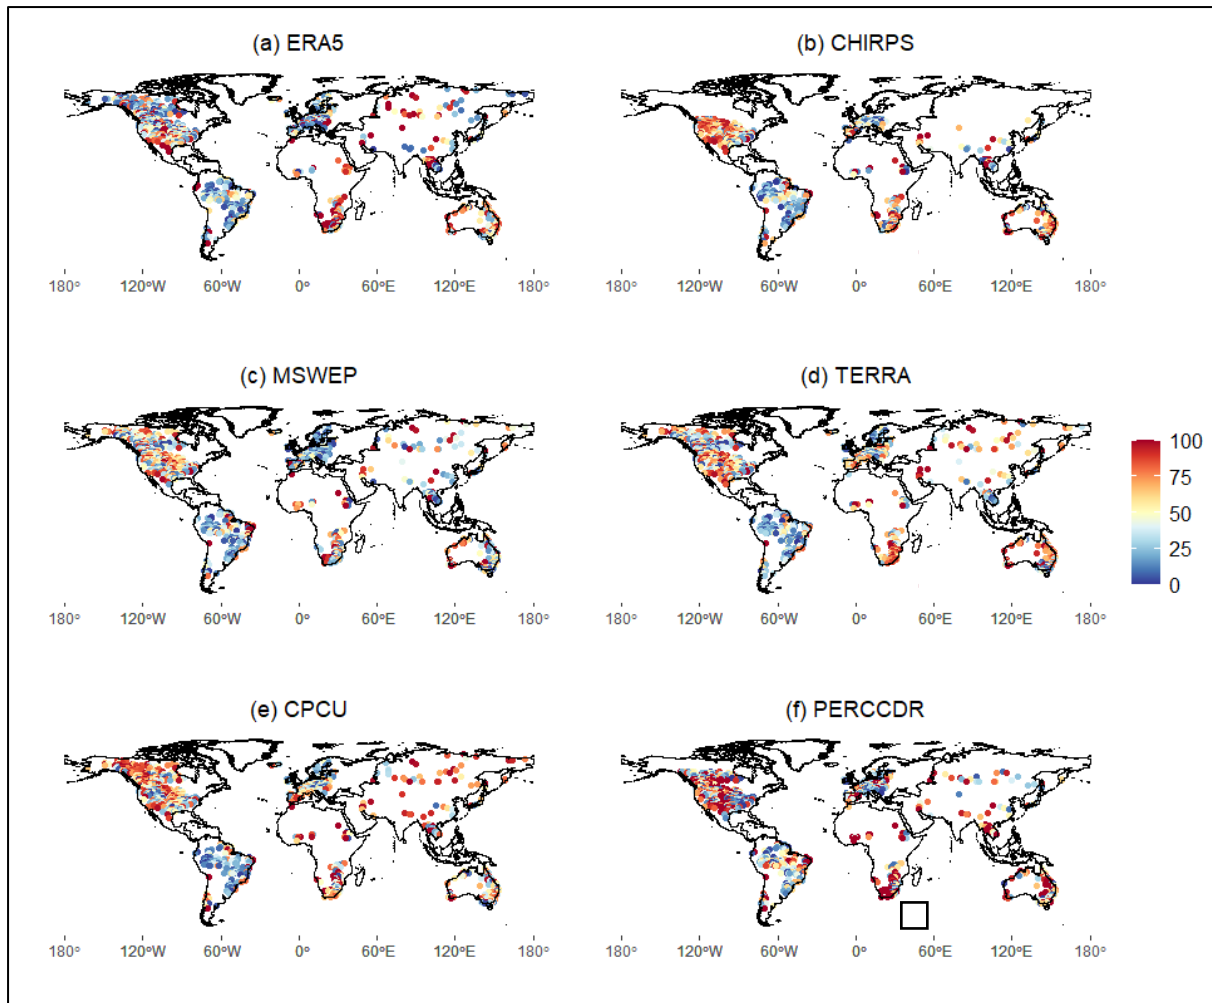

**Figure S2: Pbias between observed and simulated annual discharge based on a) ERA5, b) CHIRPS, c) MSWEP, d) TERRA, e) CPCU, and f) PERCCDR.**

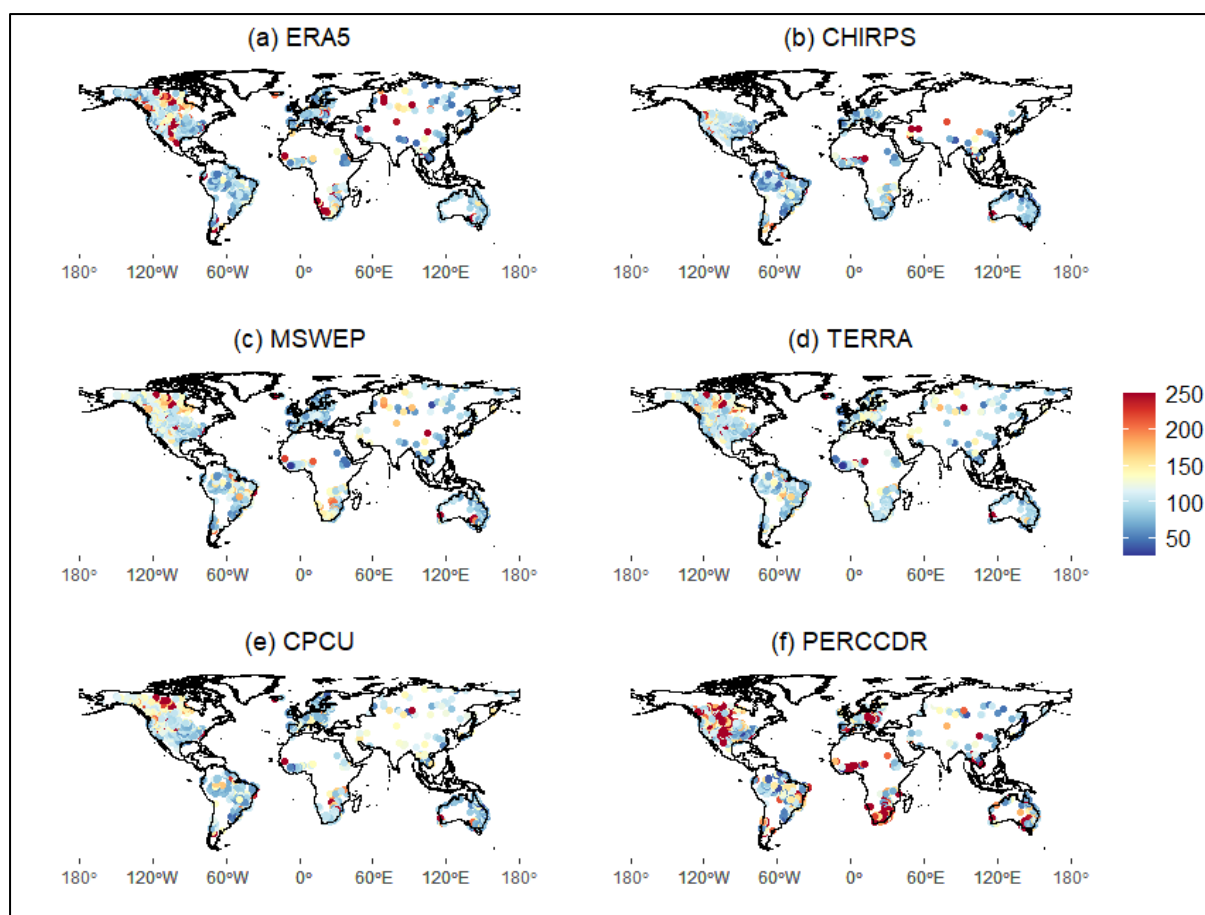

**Figure S3: Normalised RMSE between observed and simulated monthly discharge based on a) ERA5, b) CHIRPS, c) MSWEP, d) TERRA, e) CPCU, and f) PERCCDR.**

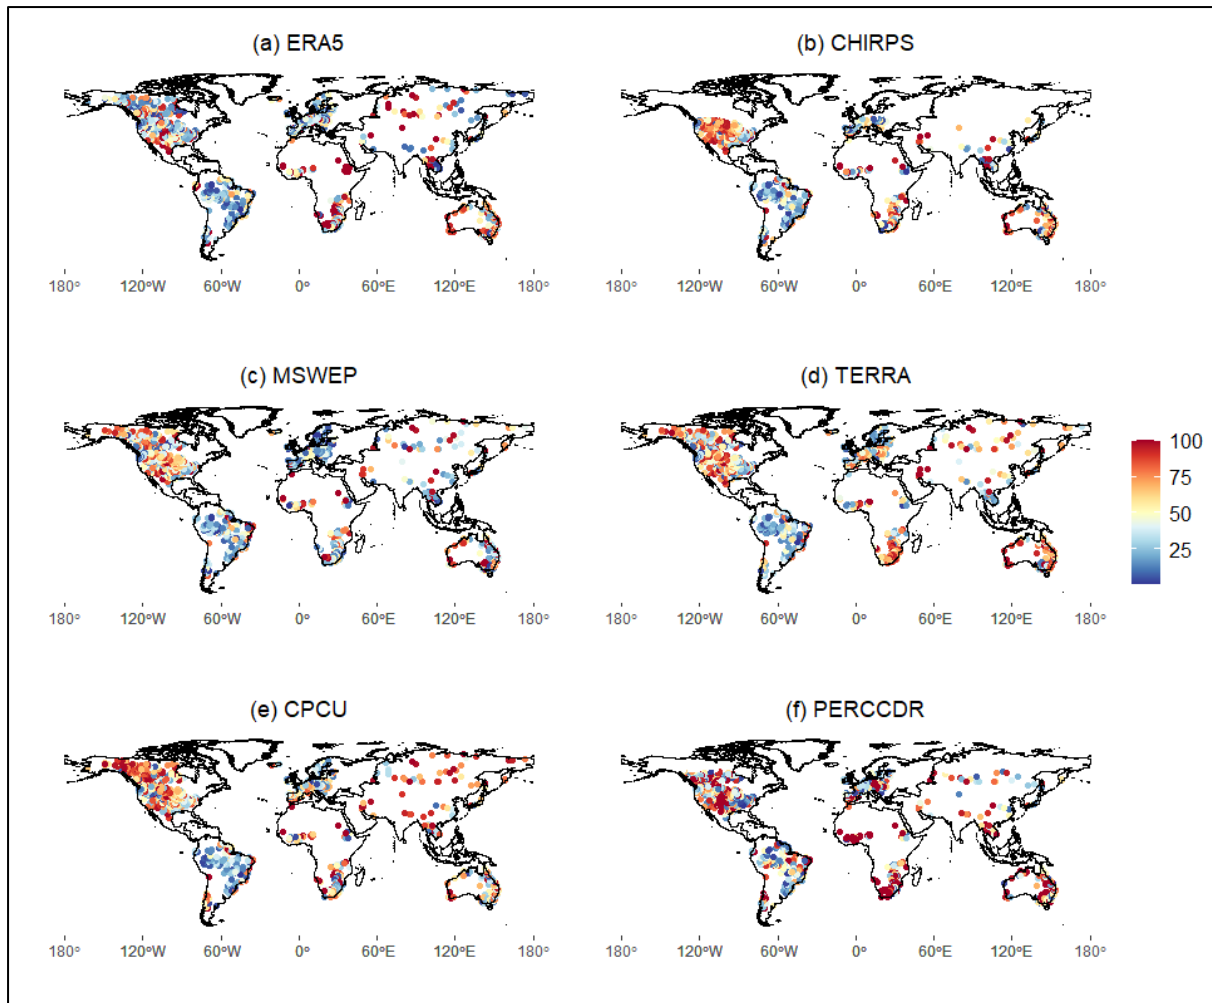

**Figure S4: Pbias between observed and simulated monthly discharge based on a) ERA5, b) CHIRPS, c) MSWEP, d) TERRA, e) CPCU, and f) PERCCDR.**

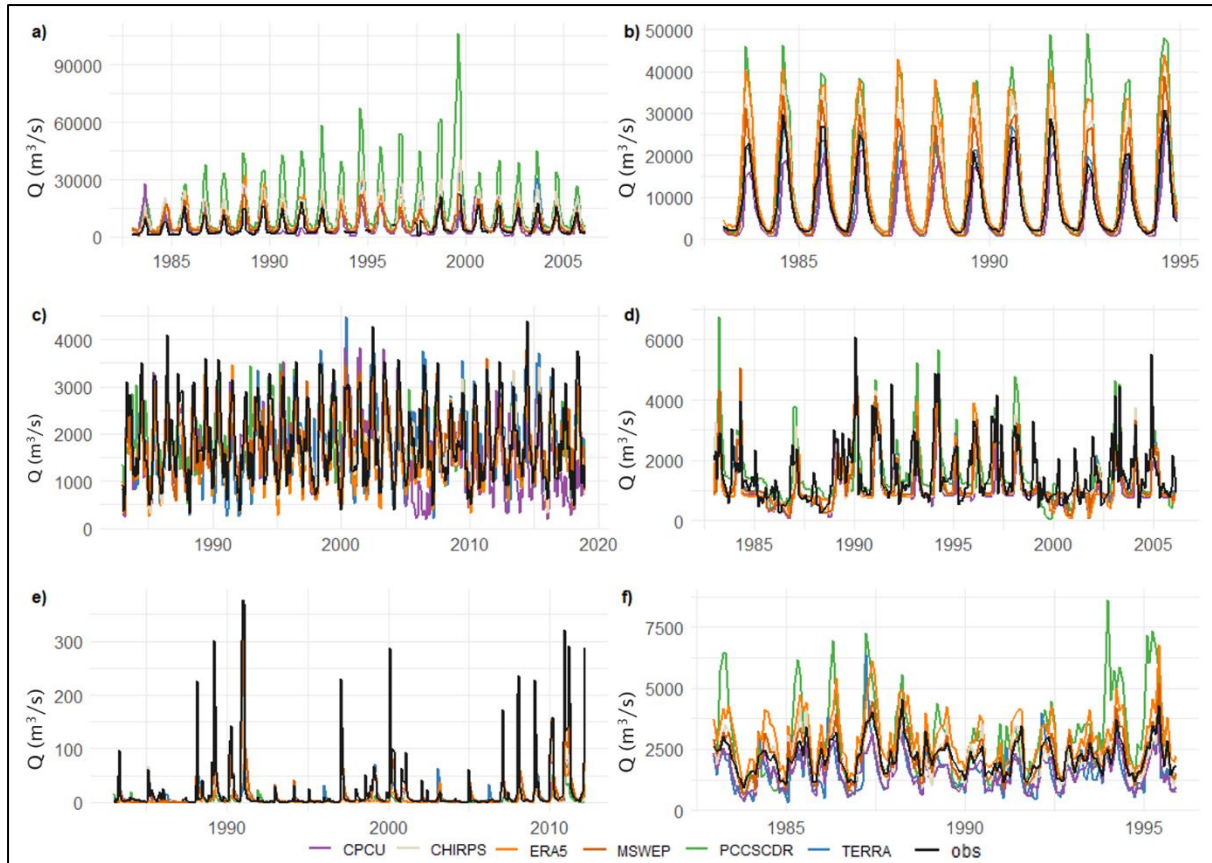

**Figure S5: Time series of monthly observed (Obs) and modelled streamflow ( $Q$ ;  $\text{m}^3/\text{s}$ ) based on MSWEP, ERA5, CHIRPS, CPCU, TERRA, and PERCCDR precipitation datasets for locations in river basins of a) Niger (Lokoja), b) Mekong (Khong-Chiam), c) Amazon (Missao-Icana), d) Mississippi (Savannah), e) North East Coast (Mirani-Weir), and f) Danube (Dunaalmas).**

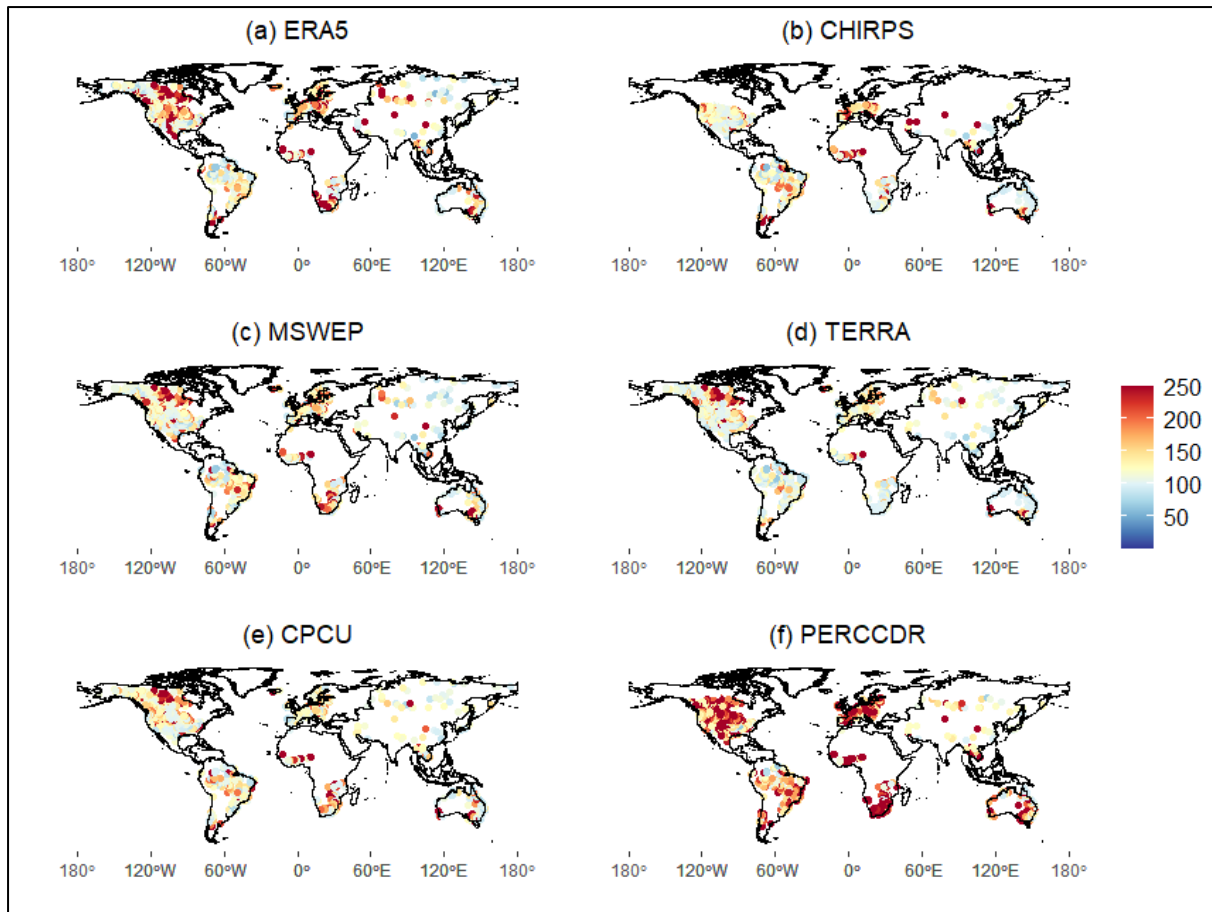

**Figure S6:** Normalised RMSE between observed and simulated daily discharge based on a) ERA5, b) CHIRPS, c) MSWEP, d) TERRA, e) CPCU, and f) PERCCDR.

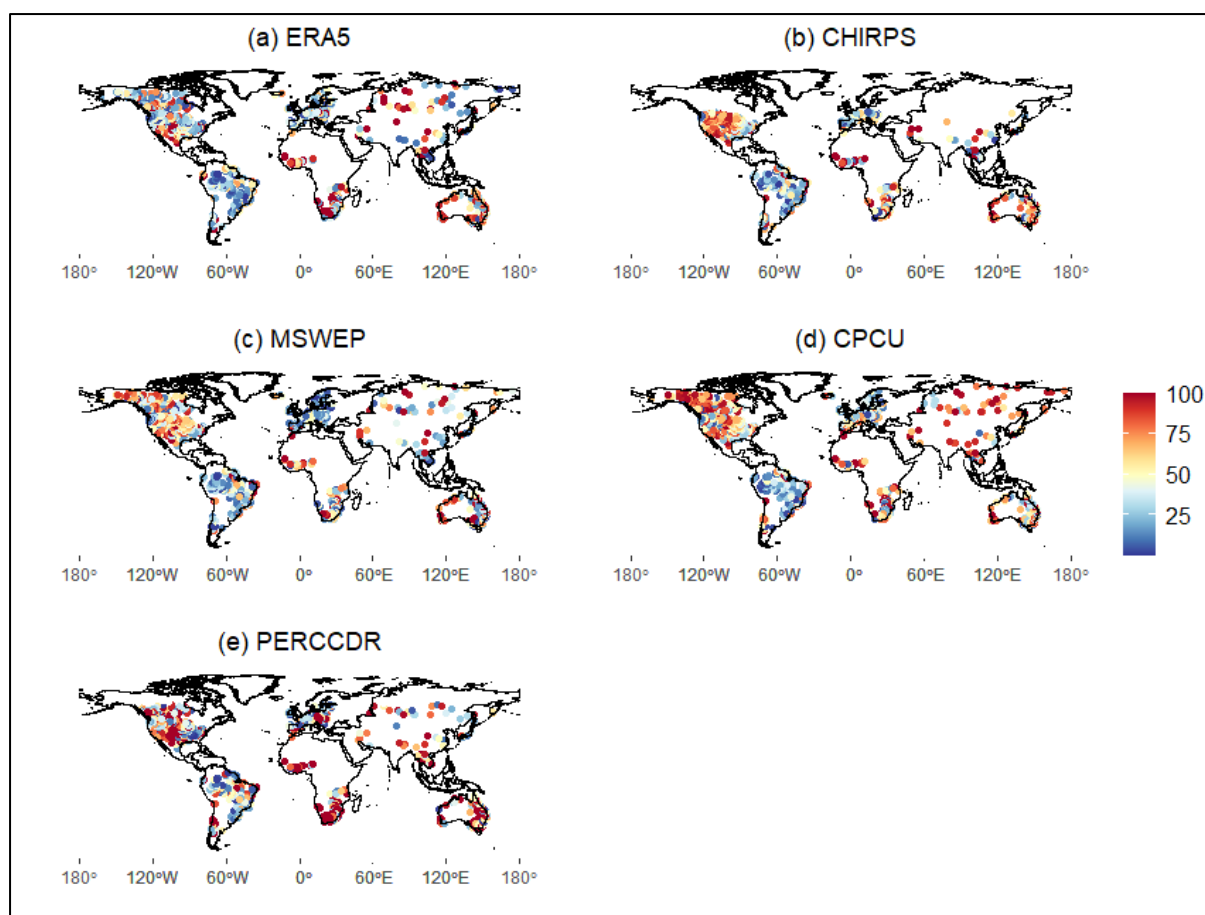

**Figure S7: Pbias between observed and simulated daily discharge based on a) ERA5, b) CHIRPS, c) MSWEP, d) CPCU, and e) PERCCDR.**

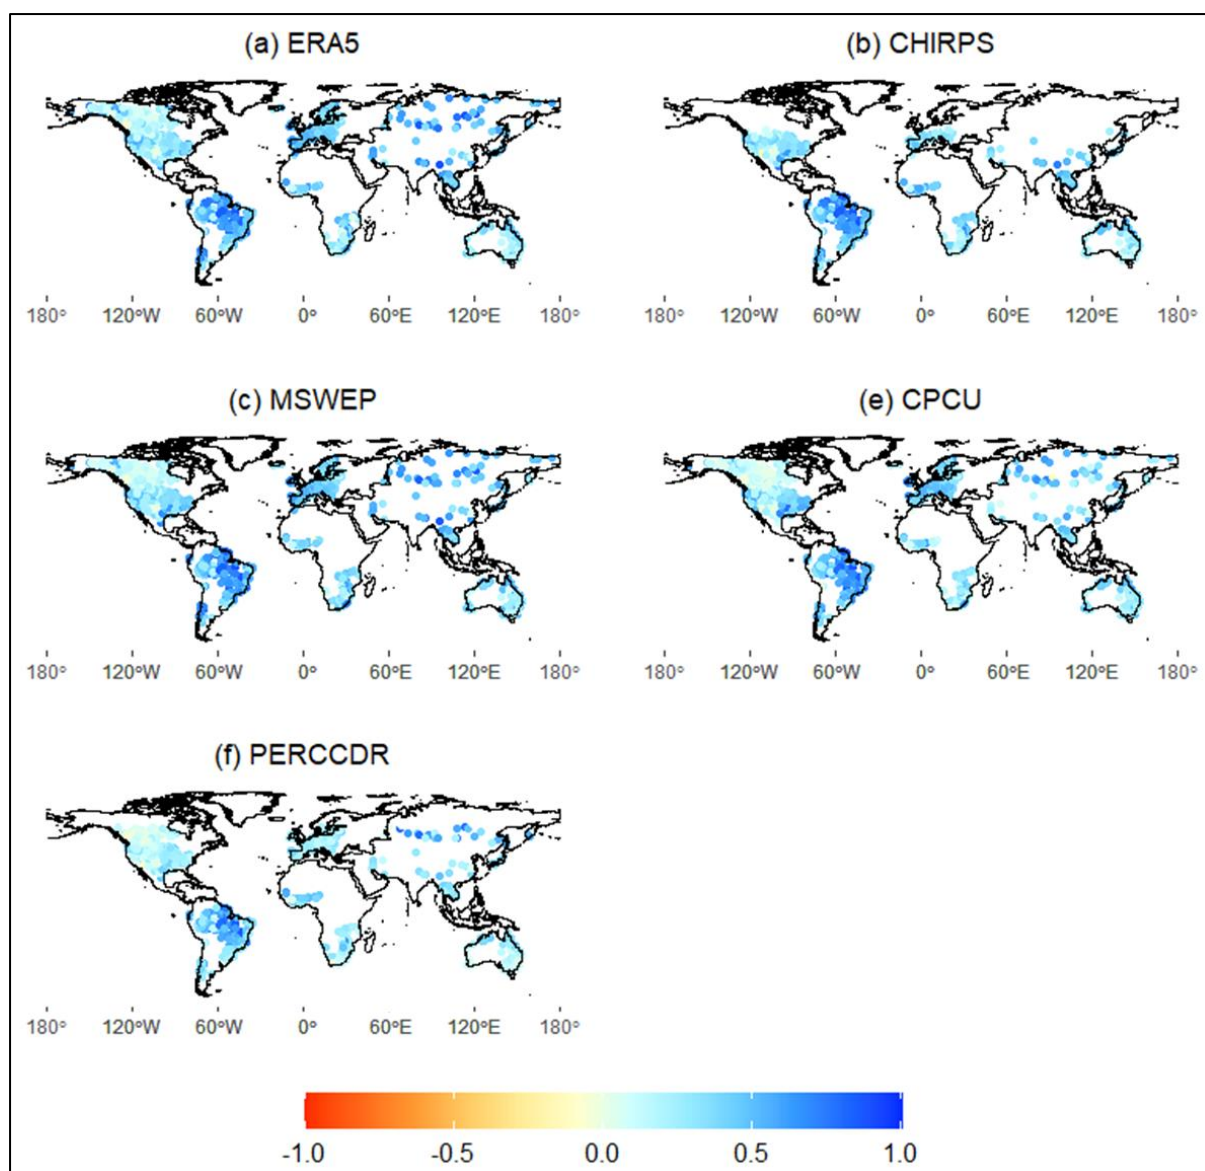

**Figure S8:** Correlation (CC) between observed and modelled daily extremes (Q90, low flow) using a) ERA5, b) CHIRPS, c) MSWEP, d) CPCU and e) PERCCDR precipitation datasets.

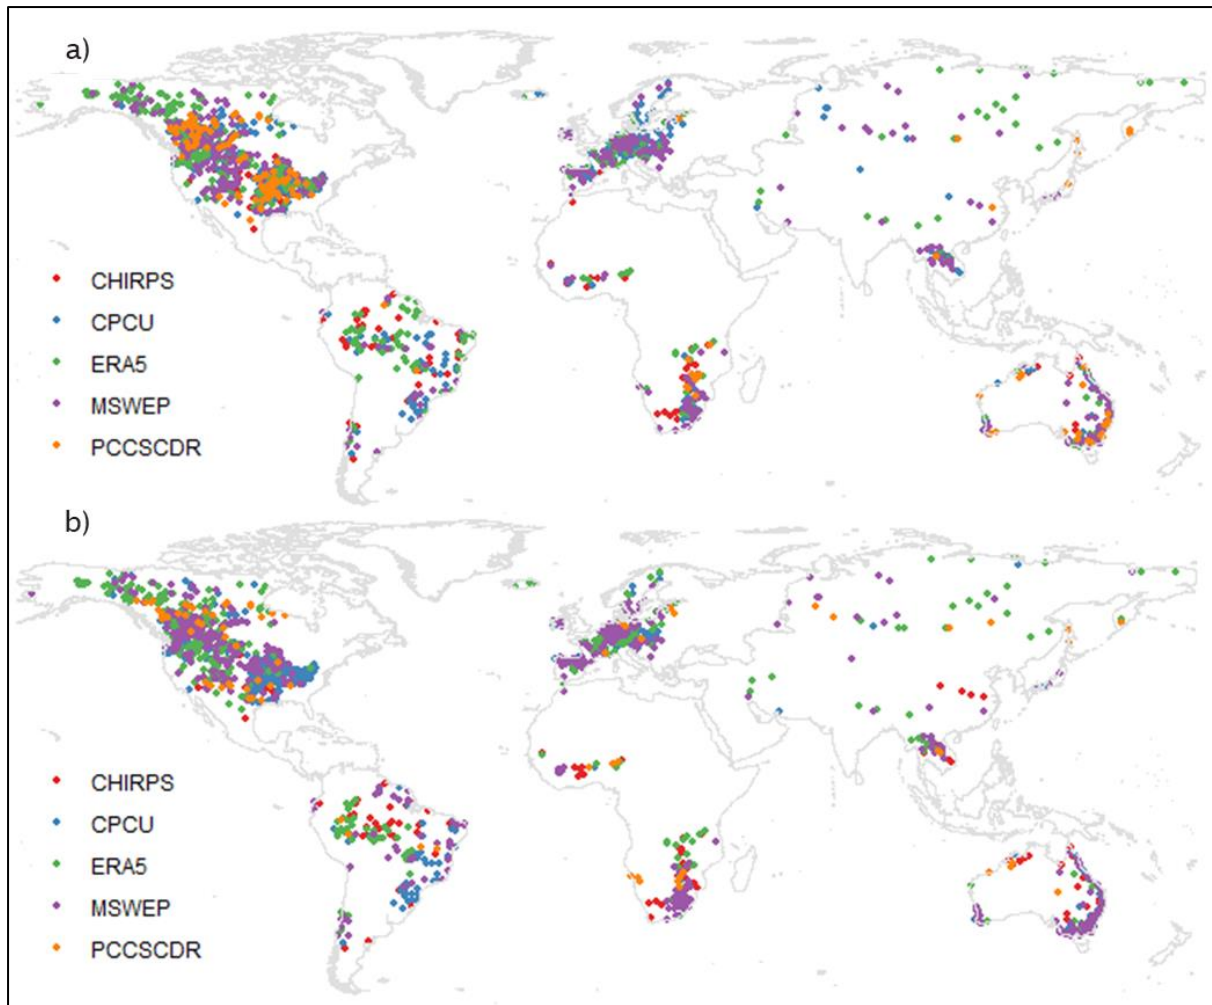

**Figure S9: The best performing precipitation dataset (CHIRPS, CPCU, ERA5, MSWEP, and PERCCDR) at each of the observed discharge stations based on daily CC (a) and KGE (b).**

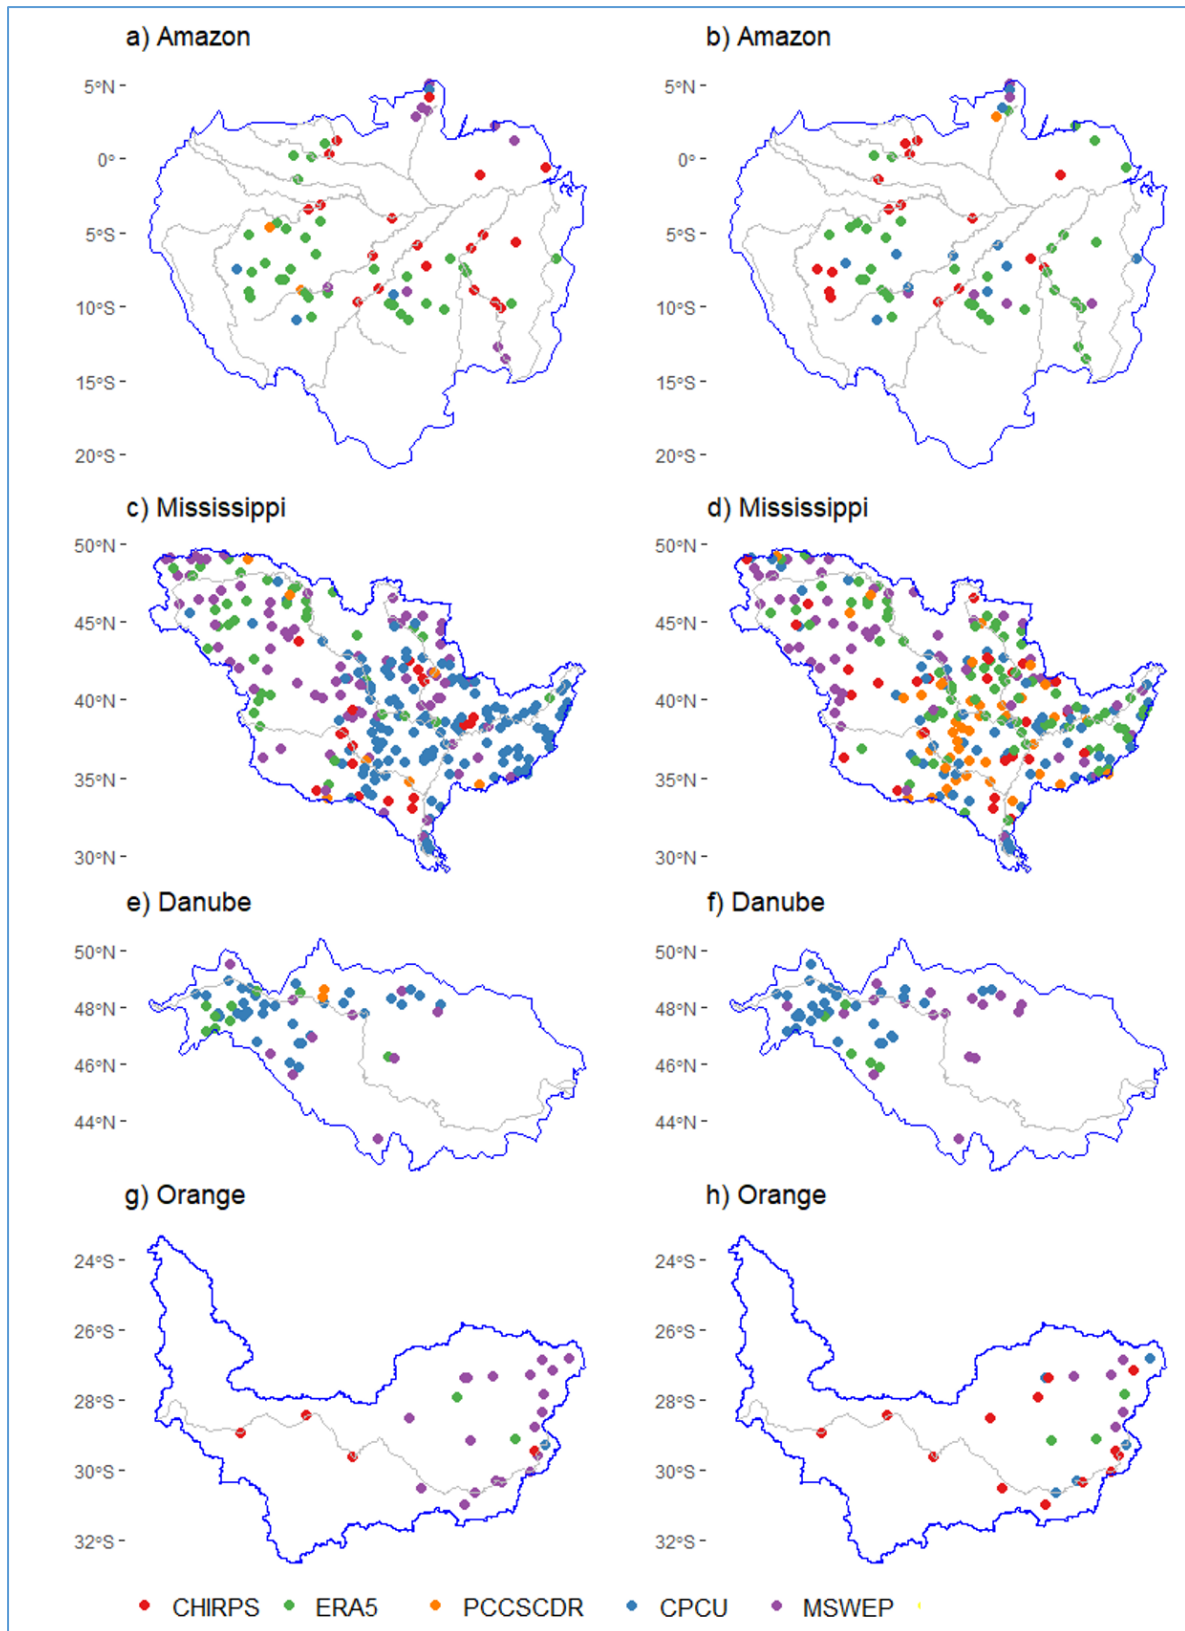

**Figure S10: Performance of Precipitation Datasets (ERA5, CHIRPS, MSWEP, CPCU, and PERCCDR) at Discharge Stations in a) Amazon, c) Mississippi, e) Danube, and g) Orange River Basins based on their daily CC. The performance of the datasets based on daily KGE for the Amazon, Mississippi, Danube, and Orange River Basins is illustrated in figures b, d, f, and h, respectively.**
